# Supplementary material
Source: ML conference proceedings conference paper supplement (https://openaccess.thecvf.com/content/ICCV2023/html/Shiohara_BlendFace_Re-designing_Identity_ICCV_2023_paper.html)
Supplement: Supplementary file 1 [file Shiohara_BlendFace_Re-designing_Identity_ICCV_2023_supplemental.pdf]

# Supplementary Material for BlendFace: Re-designing Identity Encoders for Face-Swapping

Kaede Shiohara<sup>1</sup> Xingchao Yang<sup>2</sup> Takafumi Taketomi<sup>2</sup>

<sup>1</sup>The University of Tokyo <sup>2</sup>CyberAgent AI Lab

shiohara@cvm.t.u-tokyo.ac.jp {you\_koutyo,taketomi\_takafumi}@cyberagent.co.jp

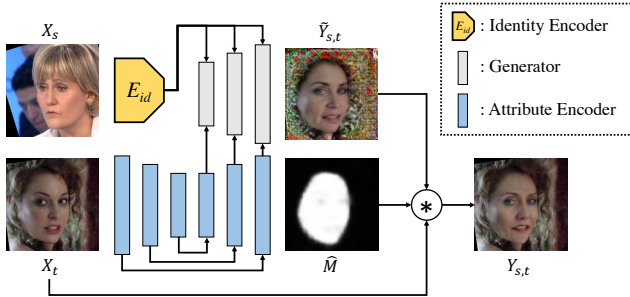

Figure 1: **Architecture of our model.** We simply add a convolution and sigmoid layer to the last layer of the original attribute encoder from AEI-Net [7].

## A. Architecture

Here, we detail the architecture of our face-swapping model. As described in the main paper, our architecture is based on AEI-Net [7] but we incorporate a mask predictor into the model inspired by previous studies [12, 13, 15]. We illustrate the architecture of our model in Fig. 1. We simply add a convolution layer and sigmoid layer to the last layer of the attribute encoder to predict blurring masks  $\hat{M}$ . We blend the foreground face image  $\tilde{Y}_{s,t}$  and target image  $X_t$  using the predicted  $\hat{M}$  as follows:

$$Y_{s,t} = \tilde{Y}_{s,t} \odot \hat{M} + X_t \odot (1 - \hat{M}). \quad (1)$$

In our model, we assume the blurring masks for the same target images should be the same independently of source images. Note that losses are computed on the blended result  $Y_{s,t}$ ; therefore, the intermediate generated face  $\tilde{Y}_{s,t}$  is noisy outside of the face.

## B. Comparison with Additional Baselines

We compare our model with two additional baselines in Fig. 2: 1) We input masked source images into a pretrained face-swapping model that is the same model as Arc-Arc in Fig. 6, denoted as *Masked Infer.*. To only include the face area below the eyebrow and between ears, we generate the

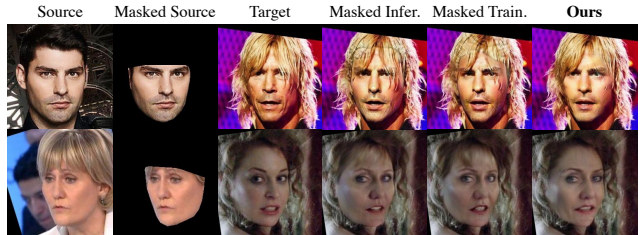

Figure 2: **Comparison with additional baselines.**

masks by computing the convex hull of 68 facial landmarks by FAN [1]. 2) We train Arc-Arc model from scratch with masked source images, denoted as *Masked Train.*. As can be seen, the models still suffer from the attribute inconsistency. Therefore, we can conclude our method is a unique solution for the attribute leakage problem.

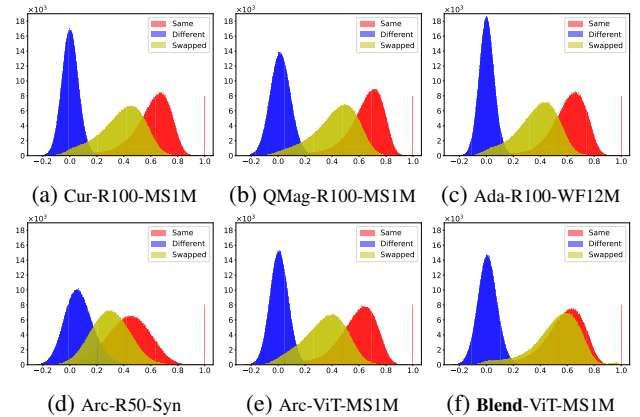

Figure 3: **Different models and dataset.**

## C. Attribute Biases on Different Face Recognition Models

We visualize the similarity distributions of different face recognition models in Fig. 3: (a) CurricularFace (Cur) [5], (b) QMagFace (QMag) [11], (c) AdaFace (Ada) [6] on a

larger dataset WebFace12M (WF12M) [17], (d) ArcFace (Arc) on GAN-generated face images (Syn) [9], and (e) ArcFace with VisionTransformer (ViT) [3]. We can see that the attribute leakage problem still exists in these various face recognition models. Additionally, we train ViT backbone using our BlendFace pretraining. As shown in Fig. 3 (f), our training strategy works well even on ViT, which proves the generality of our method.

## D. More Comparisons on FF++

We show more qualitative comparisons on FaceForensics++ [10] in Fig. 4. Our model performs consistent face-swapping for a range of source and target images compared to previous methods [2, 4, 8, 12, 14, 16].

## References

- [1] Adrian Bulat and Georgios Tzimiropoulos. How Far Are We from Solving The 2D & 3D Face Alignment Problem? (and a dataset of 230,000 3D facial landmarks). In *ICCV*, 2017. 1
- [2] Renwang Chen, Xuanhong Chen, Bingbing Ni, and Yanhao Ge. SimSwap: An Efficient Framework For High Fidelity Face Swapping. In *ACMMM*, 2020. 2
- [3] Alexey Dosovitskiy, Lucas Beyer, Alexander Kolesnikov, Dirk Weissenborn, Xiaohua Zhai, Thomas Unterthiner, Mostafa Dehghani, Matthias Minderer, Georg Heigold, Sylvain Gelly, et al. An image is worth 16x16 words: Transformers for image recognition at scale. In *ICLR*, 2020. 2
- [4] Gege Gao, Huaibo Huang, Chaoyou Fu, Zhaoyang Li, and Ran He. Information bottleneck disentanglement for identity swapping. In *CVPR*, 2021. 2
- [5] Yuge Huang, Yuhan Wang, Ying Tai, Xiaoming Liu, Pengcheng Shen, Shaoxin Li, and Feiyue Huang Jilin Li. Curricularface: Adaptive curriculum learning loss for deep face recognition. In *CVPR*, 2020. 1
- [6] Minchul Kim, Anil K Jain, and Xiaoming Liu. Adaface: Quality adaptive margin for face recognition. In *CVPR*, 2022. 1
- [7] Lingzhi Li, Jianmin Bao, Hao Yang, Dong Chen, and Fang Wen. Advancing high fidelity identity swapping for forgery detection. In *CVPR*, 2020. 1
- [8] Yuval Nirkin, Yosi Keller, and Tal Hassner. FSGAN: Subject agnostic face swapping and reenactment. In *ICCV*, 2019. 2
- [9] Haibo Qiu, Baosheng Yu, Dihong Gong, Zhifeng Li, Wei Liu, and Dacheng Tao. Synface: Face recognition with synthetic data. In *ICCV*, 2021. 2
- [10] Andreas Rössler, Davide Cozzolino, Luisa Verdoliva, Christian Riess, Justus Thies, and Matthias Niessner. Faceforensics++: Learning to detect manipulated facial images. In *ICCV*, 2019. 2
- [11] Philipp Terhörst, Malte Ihlefeld, Marco Huber, Naser Damer, Florian Kirchbuchner, Kiran Raja, and Arjan Kuijper. Qmag-face: Simple and accurate quality-aware face recognition. In *WACV*, 2023. 1
- [12] Yuhan Wang, Xu Chen, Junwei Zhu, Wenqing Chu, Ying Tai, Chengjie Wang, Jilin Li, Yongjian Wu, Feiyue Huang, and Rongrong Ji. Hifface: 3d shape and semantic prior guided high fidelity face swapping. In *IJCAI*, 2021. 1, 2
- [13] Chao Xu, Jiangning Zhang, Miao Hua, Qian He, Zili Yi, and Yong Liu. Region-aware face swapping. In *CVPR*, 2022. 1
- [14] Yangyang Xu, Bailin Deng, Junle Wang, Yanqing Jing, Jia Pan, and Shengfeng He. High-resolution face swapping via latent semantics disentanglement. In *CVPR*, 2022. 2
- [15] Zhiliang Xu, Hang Zhou, Zhibin Hong, Ziwei Liu, Jiaming Liu, Zhizhi Guo, Junyu Han, Jingtuo Liu, Errui Ding, and Jingdong Wang. Styleswap: Style-based generator empowers robust face swapping. In *ECCV*, 2022. 1
- [16] Yuhao Zhu, Qi Li, Jian Wang, Chengzhong Xu, and Zhenan Sun. One shot face swapping on megapixels. In *CVPR*, June 2021. 2
- [17] Zheng Zhu, Guan Huang, Jiankang Deng, Yun Ye, Junjie Huang, Xinze Chen, Jiagang Zhu, Tian Yang, Jiwen Lu, Dalong Du, et al. Webface260m: A benchmark unveiling the power of million-scale deep face recognition. In *CVPR*, 2021. 2



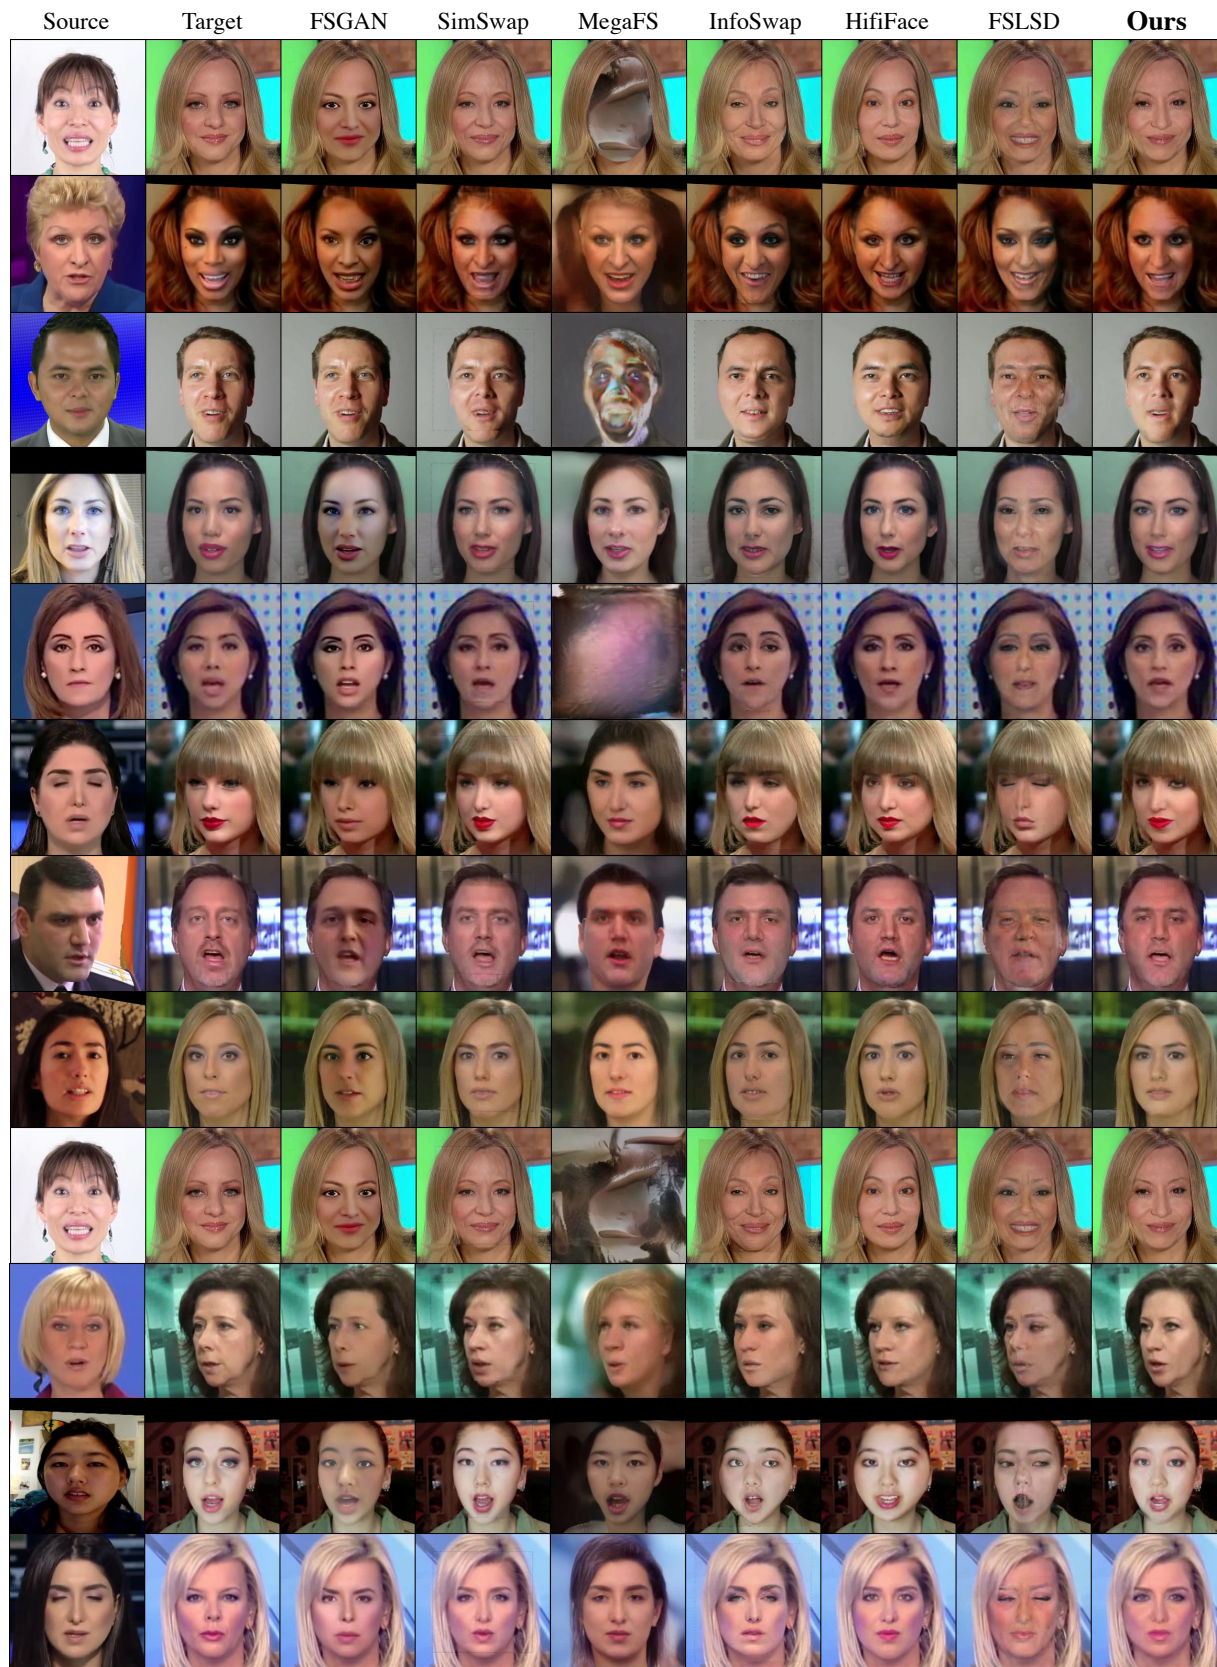

Figure 4: More comparisons on FF++.
